# Supplementary material for: Surfactant-free hydrothermal synthesis of hierarchical flower-like Bi2WO6 mesosphere nanostructures with excellent visible-light photocatalytic activity
Source: Royal Society of Chemistry journal article supplement (doi:10.1039/c9ce01170f), 2019-01-01
Supplement: c9ce01170f1.pdf [file c9ce01170f1.pdf]

Electronic supplementary information for

**Surfactant-free hydrothermal synthesis of hierarchical flower-like  $\text{Bi}_2\text{WO}_6$  mesosphere nanostructures with excellent visible-light photocatalytic activity**

Wan Jiang,<sup>a</sup> Tongshuai Huangfu,<sup>a</sup> Xin Yang,<sup>b</sup> Liang Bao,<sup>a,c</sup> Yong Liu,<sup>\*,a</sup> Gang Xu,<sup>\*,a</sup> Gaorong Han,<sup>a</sup>

- a. State Key Laboratory of Silicon Materials and Department of Materials Science and Engineering, Zhejiang University, Hangzhou 310027, China
- b. Key Laboratory of Advanced Technique & Preparation for Renewable Energy Materials, Ministry of Education, Yunnan Normal University, Yunnan 650500, China.
- c. College of Materials & Environmental Engineering, Hangzhou Dianzi University, Hangzhou 310018, China.

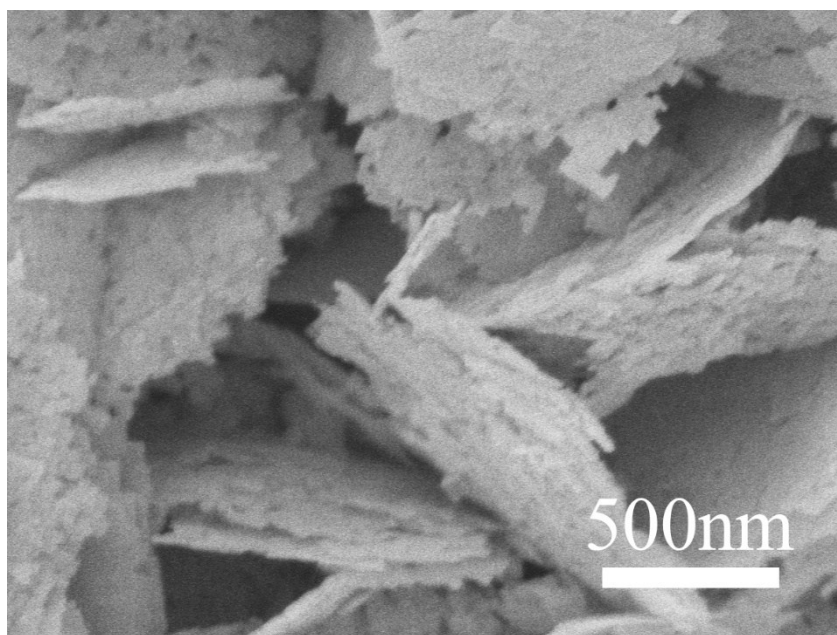

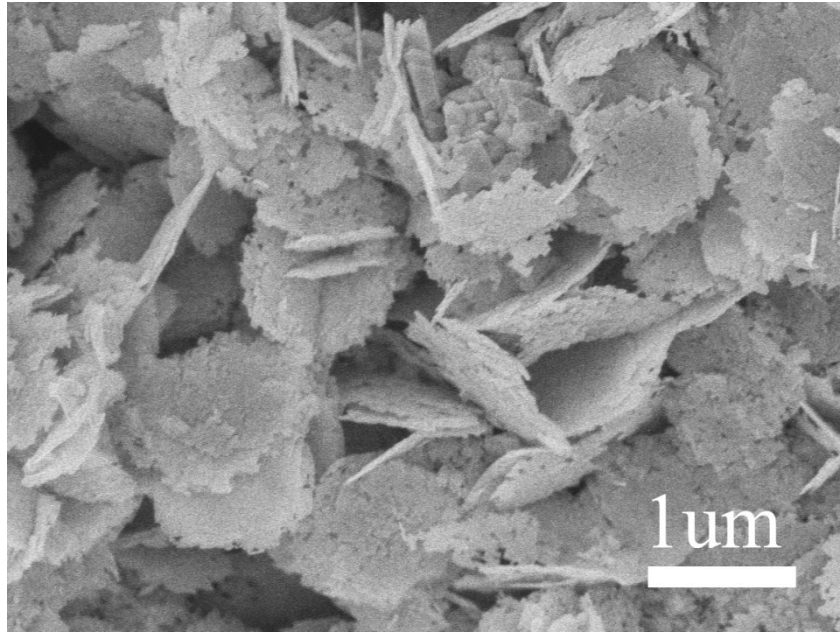

Fig. S1 SEM images of the single-crystalline Bi<sub>2</sub>WO<sub>6</sub> nanosheets obtained at pH~6

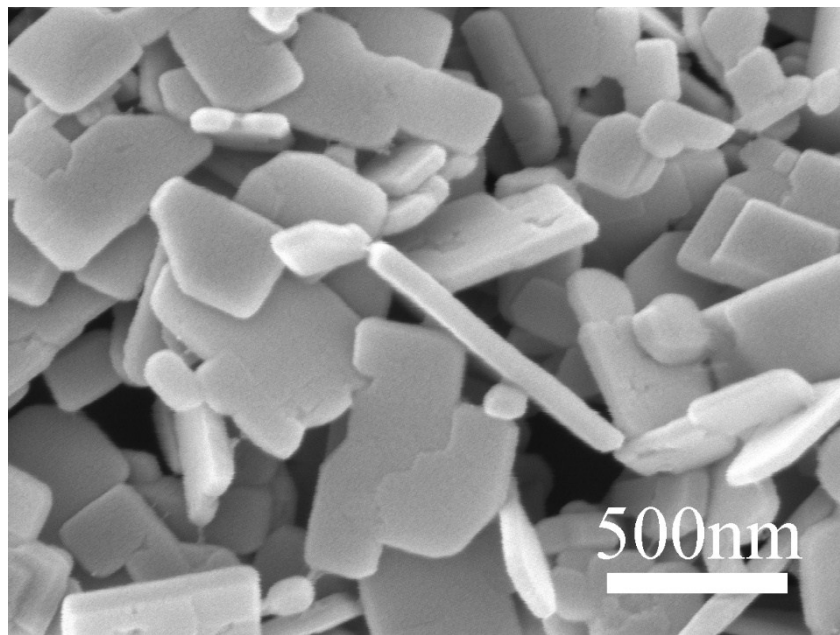

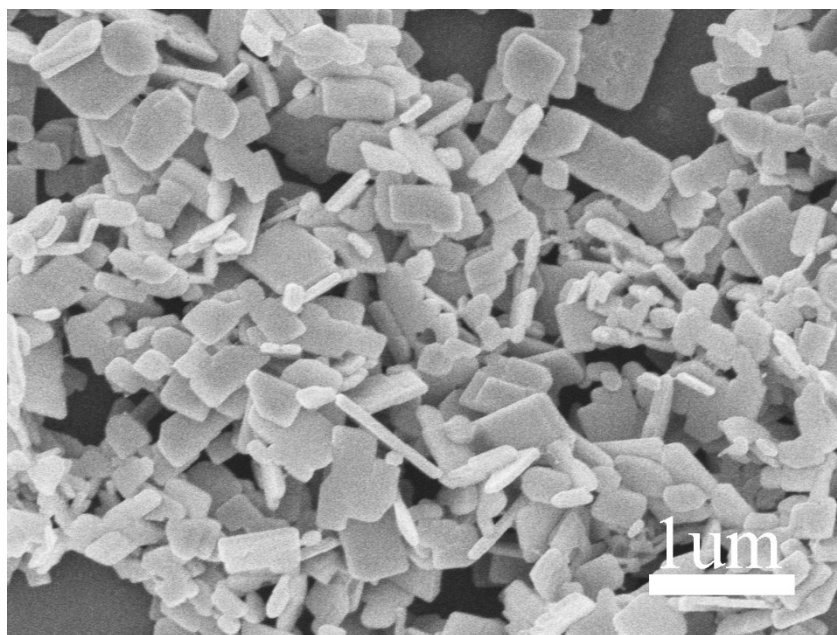

Fig. S2 SEM images of the single-crystalline Bi<sub>2</sub>WO<sub>6</sub> nanosheets obtained at pH~8

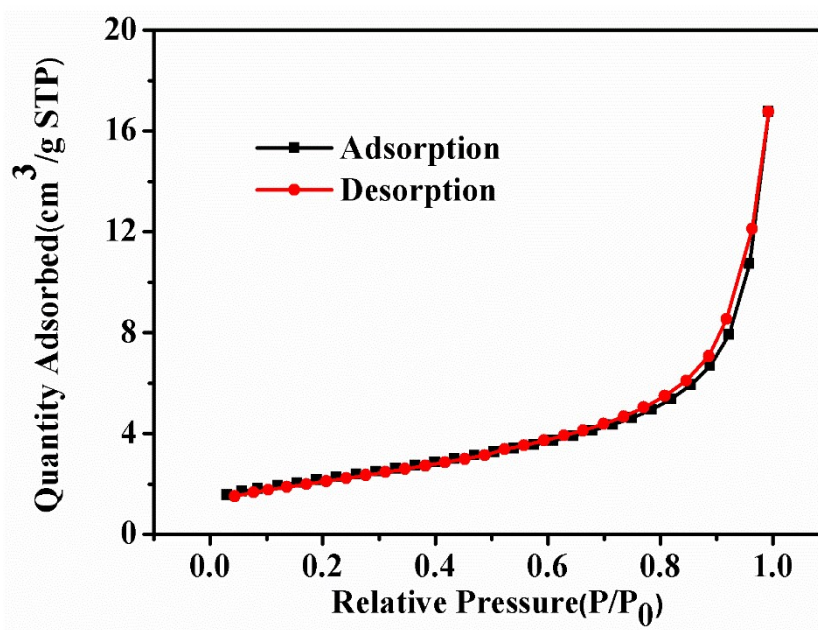

Fig. S3 N<sub>2</sub> adsorption-desorption isotherm curves of the single-crystalline Bi<sub>2</sub>WO<sub>6</sub> nanosheets obtained at pH~8
