# Supplementary material for: Surfactant-free hydrothermal synthesis of hierarchical flower-like Bi2WO6 mesosphere nanostructures with excellent visible-light photocatalytic activity
Source: Royal Society of Chemistry journal article supplement (doi:10.1039/c9ce01170f), 2019-01-01
Supplement: c9ce01170f2.pdf [file c9ce01170f2.pdf]

Electronic supplementary information for

**Surfactant-free hydrothermal synthesis of hierarchical flower-like  $\text{Bi}_2\text{WO}_6$  mesosphere nanostructures with excellent visible-light photocatalytic activity**

Wan Jiang,<sup>a</sup> Tongshuai Huangfu,<sup>a</sup> Liang Bao,<sup>a,b</sup> Xianqian Meng,<sup>c</sup> Yong Liu,<sup>a</sup> Gang Xu,<sup>a\*</sup> Gaorong Han,<sup>a</sup>

a. State Key Laboratory of Silicon Materials and Department of Materials Science and Engineering, Zhejiang University, Hangzhou 310027, China

b. College of Materials & Environmental Engineering, Hangzhou Dianzi University, Hang Zhou 310018, China.

c. Industrial Technology Research Institute of Zhejiang University, Hangzhou 310027, China

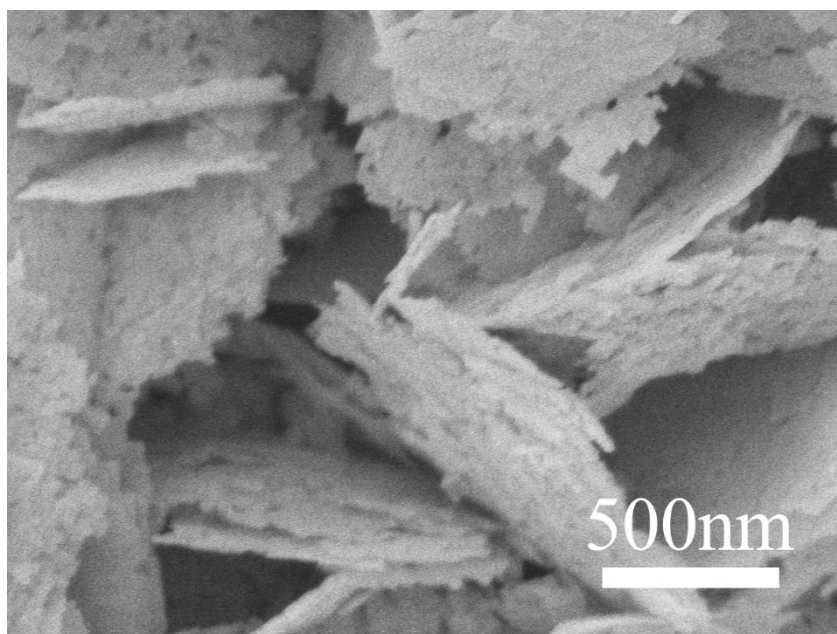

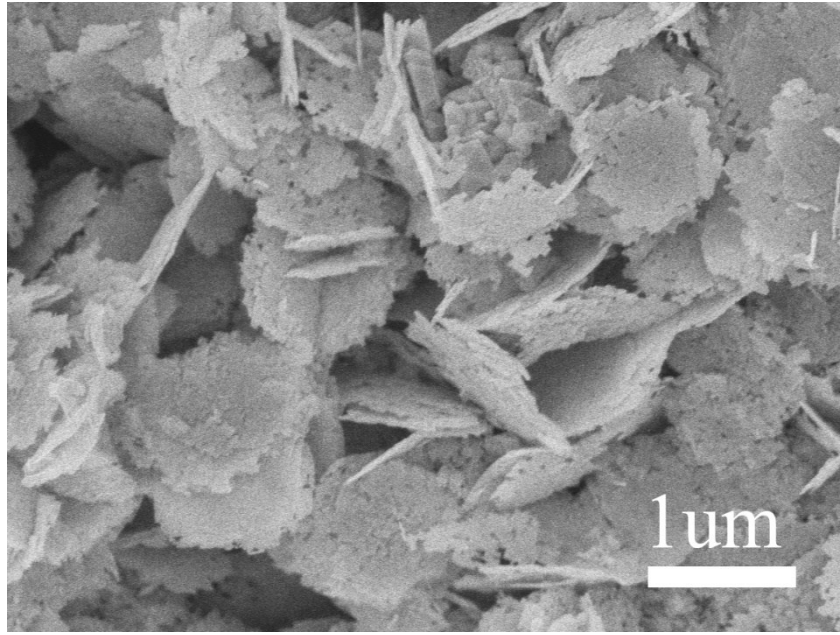

Fig. S1 SEM images of the single-crystalline Bi<sub>2</sub>WO<sub>6</sub> nanosheets obtained at pH~6

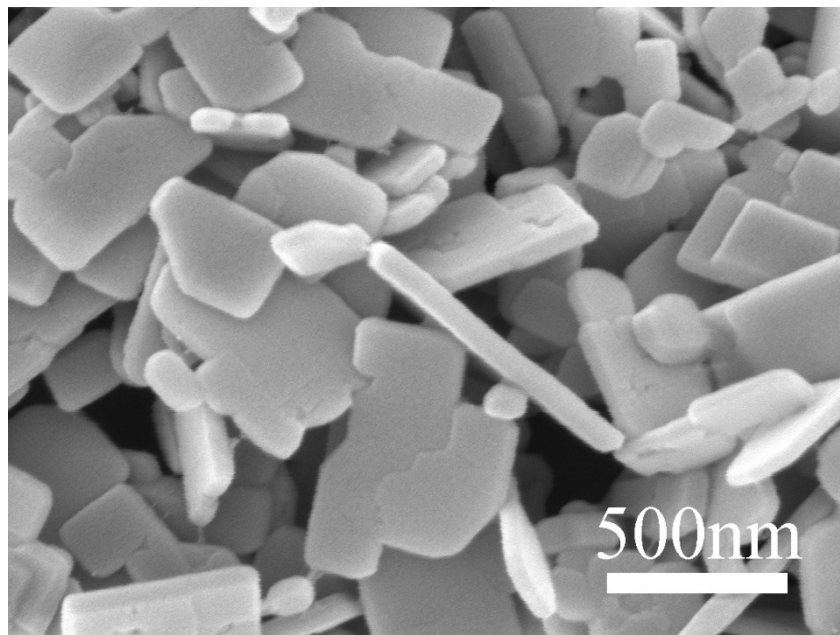

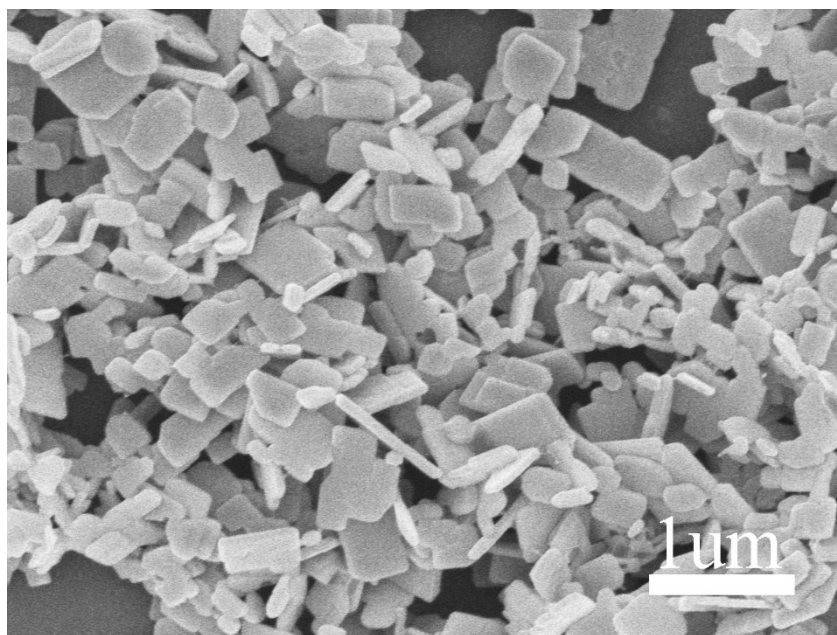

Fig. S2 SEM images of the single-crystalline Bi<sub>2</sub>WO<sub>6</sub> nanosheets obtained at pH~8

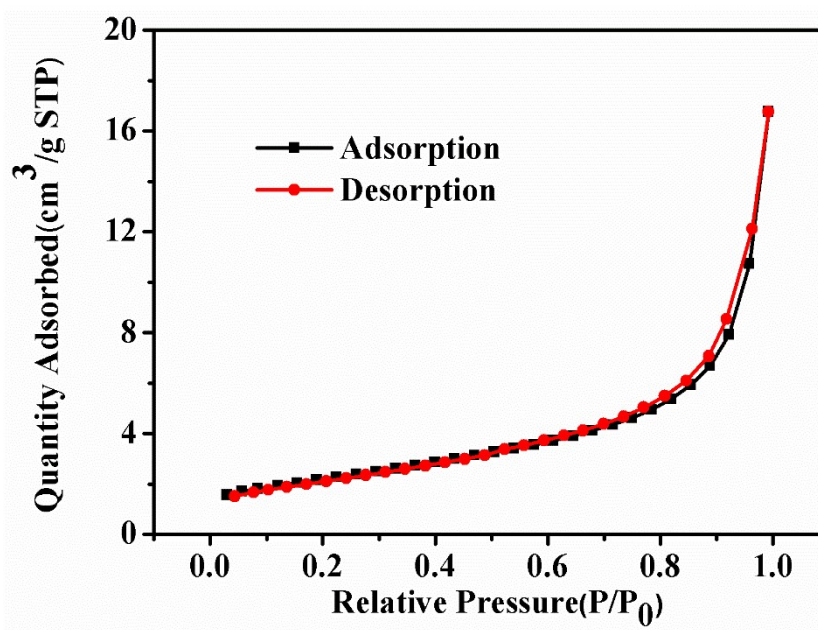

Fig. S3 N<sub>2</sub> adsorption-desorption isotherm curves of the single-crystalline Bi<sub>2</sub>WO<sub>6</sub> nanosheets obtained at pH~8
